# Supplementary material for: Preparation and Adsorption Performance Study of Graphene Quantum Dots@ZIF-8 Composites for Highly Efficient Removal of Volatile Organic Compounds
Source: MDPI journal article supplement (doi:10.3390/nano12224008), 2022-11-14
Supplement: s1 [file s1]

# Preparation and Adsorption Performance Study of Graphene Quantum Dots@ZIF-8 Composites for Highly Efficient Removal of Volatile Organic Compounds

Hao Li <sup>1,\*</sup>, Youliang Cheng <sup>2,\*</sup>, Jiaxian Li <sup>2</sup>, Tiehu Li <sup>1</sup>, Jia Zhu <sup>2</sup>, Weibin Deng <sup>1</sup>, Jiajia Zhu <sup>1</sup> and Delong He <sup>3</sup>

<sup>1</sup> School of Materials Science and Engineering, Northwestern Polytechnical University, Xi'an 710072, China

<sup>2</sup> Faculty of Printing, Packaging Engineering and Digital Media Technology, Xi'an University of Technology, Xi'an 710048, China

<sup>3</sup> Laboratoire de Mécanique Paris-Saclay, Université Paris-Saclay, CentraleSupélec, ENS Paris-Saclay, CNRS, 91190 Gif-sur-Yvette, France

\* Correspondence: lihao@nwpu.edu.cn (H.L.); chengyouliang@xaut.edu.cn (Y.C.)

## 1. ZETA potential analysis

The ZETA potentials of the GQDs, ZIF-8 and the GQDs@ZIF-8 composites were measured by a zeta potential analyzer (Malvern, Zetasizer ZS90) in liquid phase without pH adjustment, and the results are shown in Table S1. The ZETA potentials of GQDs and ZIF-8 are -26.2 mV and 19.6 mV, respectively. After the compounding, the ZETA potential of the GQDs@ZIF-8 composite became 15.7 mV, revealing that GQDs was successfully grafted on the surface of ZIF-8, which was connected by strong electrostatic attraction with good stability.

Table S1. ZETA potentials of GQDs, ZIF-8 and the GQDs@ZIF-8 composite

|                     | GQDs  | ZIF-8 | ZIF-8@GQDs |
|---------------------|-------|-------|------------|
| ZETA potential (mV) | -26.2 | +19.6 | +15.7      |

## 2. Effect of GQD content on the removal percentage of toluene and ethyl acetate

The influence of the GQD content (weight content of GQDs in GQDs@ZIF-8 composites) on the adsorption property of the GQDs@ZIF-8 composites was studied, with the GQD contents of 0, 3, 5 and 7%, respectively. The sample mass of 100 mg, toluene concentration of 400 mg/L, ethyl acetate concentration of 800 mg/L, adsorption time of 180 min, and pH value of 7 were applied. When the GQD content of 0% was applied, the raw ZIF-8 was obtained, as presented in Section 3.6 of the manuscript (Figures 8-10). When the GQD content was 5%, the adsorption property was the best. When the GQD content increased to 7%, the excessive GQDs trended to agglomerate on the surface of ZIF-8, causing the reduction of the adsorption property. Therefore, based on the experimental results, we chose a GQD content of 5% in this study.

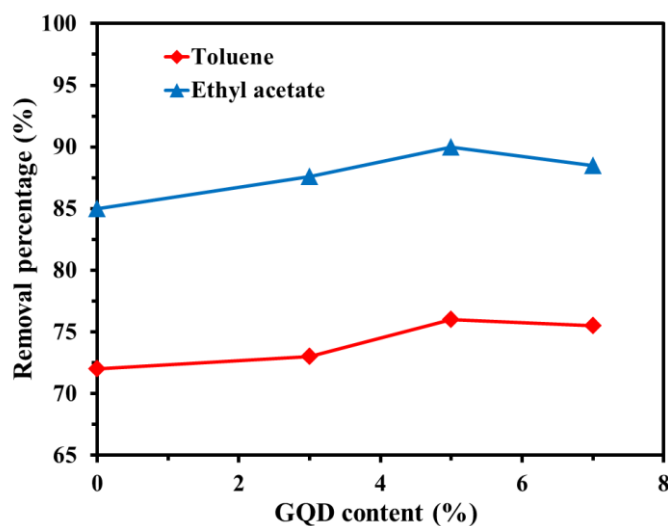

Figure S1. Effect of GQD content on the removal percentage of toluene and ethyl acetate
